# Supplementary material for: Quantifying the trade-offs in re-operating dams for the environment in the Lower Volta River
Source: Copernicus journal article supplement (doi:10.5194/hess-2022-270), 2022-08-04
Supplement: Supplementary file 1 [file hess-2022-270-supplement.pdf]

# 1 Quantifying the trade-offs in re-operating dams for the environment

## 2 in the Lower Volta River

3 Afua Owusu<sup>a,b</sup>, Jazmin Zatarain Salazar<sup>b</sup>, Marloes Mul<sup>a</sup>, Pieter van der Zaag<sup>a,c</sup>, Jill Slinger<sup>b,d</sup>

4 <sup>a</sup> Land and Water Management Department, IHE Delft Institute for Water Education, Westvest 7, 2611  
5 AX Delft, The Netherlands

6 <sup>b</sup> Faculty of Technology, Policy and Management, TU Delft, Jaffalaan 5, 2628 BX Delft, The Netherlands

7 <sup>c</sup> Faculty of Civil Engineering and Geosciences, TU Delft, Stevinweg 1, 2628 CN Delft, The Netherlands

8 <sup>d</sup> Institute of Water Research, Rhodes University, Drosty Rd, Grahamstown, 6139, South Africa

### 9 Supplementary material

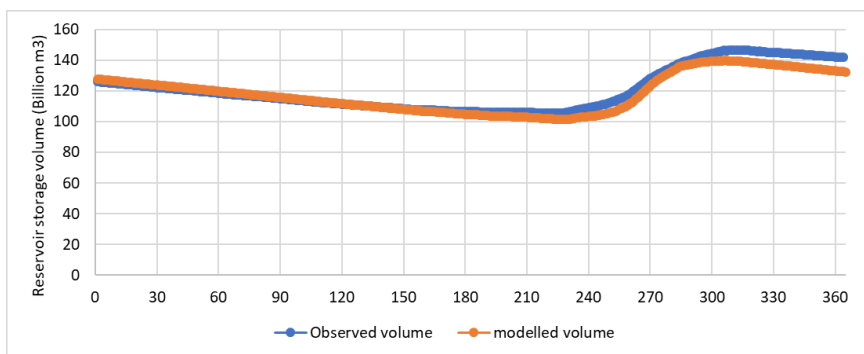

Figure S1: Observed volume as compared with modelled volume (2010, wet year)

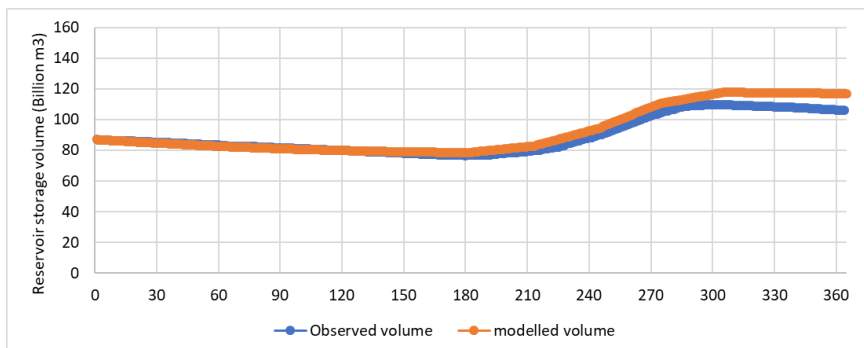

Figure S2: Observed volume as compared with modelled volume (1985, normal year)

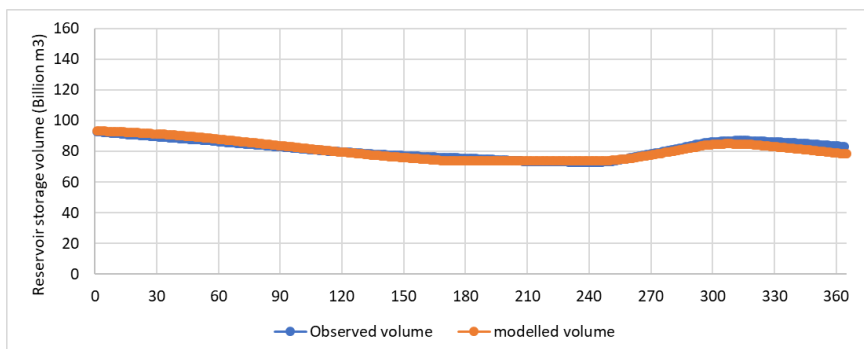

Figure S3: Observed volume as compared with modelled volume (2006, dry year)

11 *Table S1: Papers on climate change effects on runoff in the Volta basin. The first four papers are as reviewed by Roudier et*  
 12 *al., 2014 with the exception of the summary of the predictions*

| Reference                       | Time period                          | Climate model                                                              | Hydrological model | Scenarios       | Predictions                                                                                                                                                              |
|---------------------------------|--------------------------------------|----------------------------------------------------------------------------|--------------------|-----------------|--------------------------------------------------------------------------------------------------------------------------------------------------------------------------|
| <b>Kunstmann and Jung, 2005</b> | 2030-2040                            | ECHAM4-MM6                                                                 | OSU-LSM            | IS92a           | Monthly changes:<br>increase: May-June & Aug-Nov (range 20-55%)<br>decrease: July (10%); Feb-May and Dec (20%-75%)<br><br>Annual trend:<br>18% increase in annual runoff |
| <b>Aerts et al., 2006</b>       | 2001-2099                            | ECBilt-CLIO-VECODE                                                         | STREAM             | A2              | Annual trend:<br>65% increase mean decadal runoff                                                                                                                        |
| <b>Jung et al., 2012</b>        | 2030-2039                            | ECHAM4-MM5                                                                 | WaSIM              | IS92a           | Monthly changes:<br>increase: Jun, Sept & Oct (range 15-30%)<br>decrease: July & Aug (6-8%)<br><br>Annual trend:<br>4% increase in annual runoff                         |
| <b>McCartney et al., 2012</b>   | 2071/2100<br>2021/2050,<br>1983/2012 | ECHAM4-MM5<br>HadCM3                                                       | SWAT and WEAP      | A1B             | Annual trend:<br>45% decrease in annual runoff                                                                                                                           |
| <b>Sood et al., 2013</b>        | 2021-2050<br>2071-2100               | ECHAM5                                                                     | SWAT               | A1B             | Annual trend:<br>Decrease by 13% in water yield in 2021-2015<br>Decrease of 40% in 2071-2100                                                                             |
| <b>Amisigo et al., 2015</b>     | 2010-2050                            | NCAR_CCSM3_0<br>A2<br>CSIRO_MK3_0<br>A2<br>NCAR_PCM1<br>A1b<br>IPSL_CM4 B1 | WEAP               | A2<br>A1b<br>B1 | Inconsistent results across scenarios                                                                                                                                    |
| <b>Jin et al., 2018</b>         | 1951-2100                            | CNRM-CM5<br>HadGEM2-ES<br>CanESM2                                          | INCA               | RCP 8.5         | Monthly changes:<br>increase: wet season flow: June to Sept (10-50%)<br>decrease: dry season months                                                                      |
| <b>Abubakari, 2021</b>          | 2011-2040<br>2041-2070<br>2071-2100  | CFSR                                                                       | SWAT               | A1B             | Monthly changes:<br>increase: February to August<br>decrease: September to January<br><br>Annual trend:<br>12% increase in annual runoff                                 |

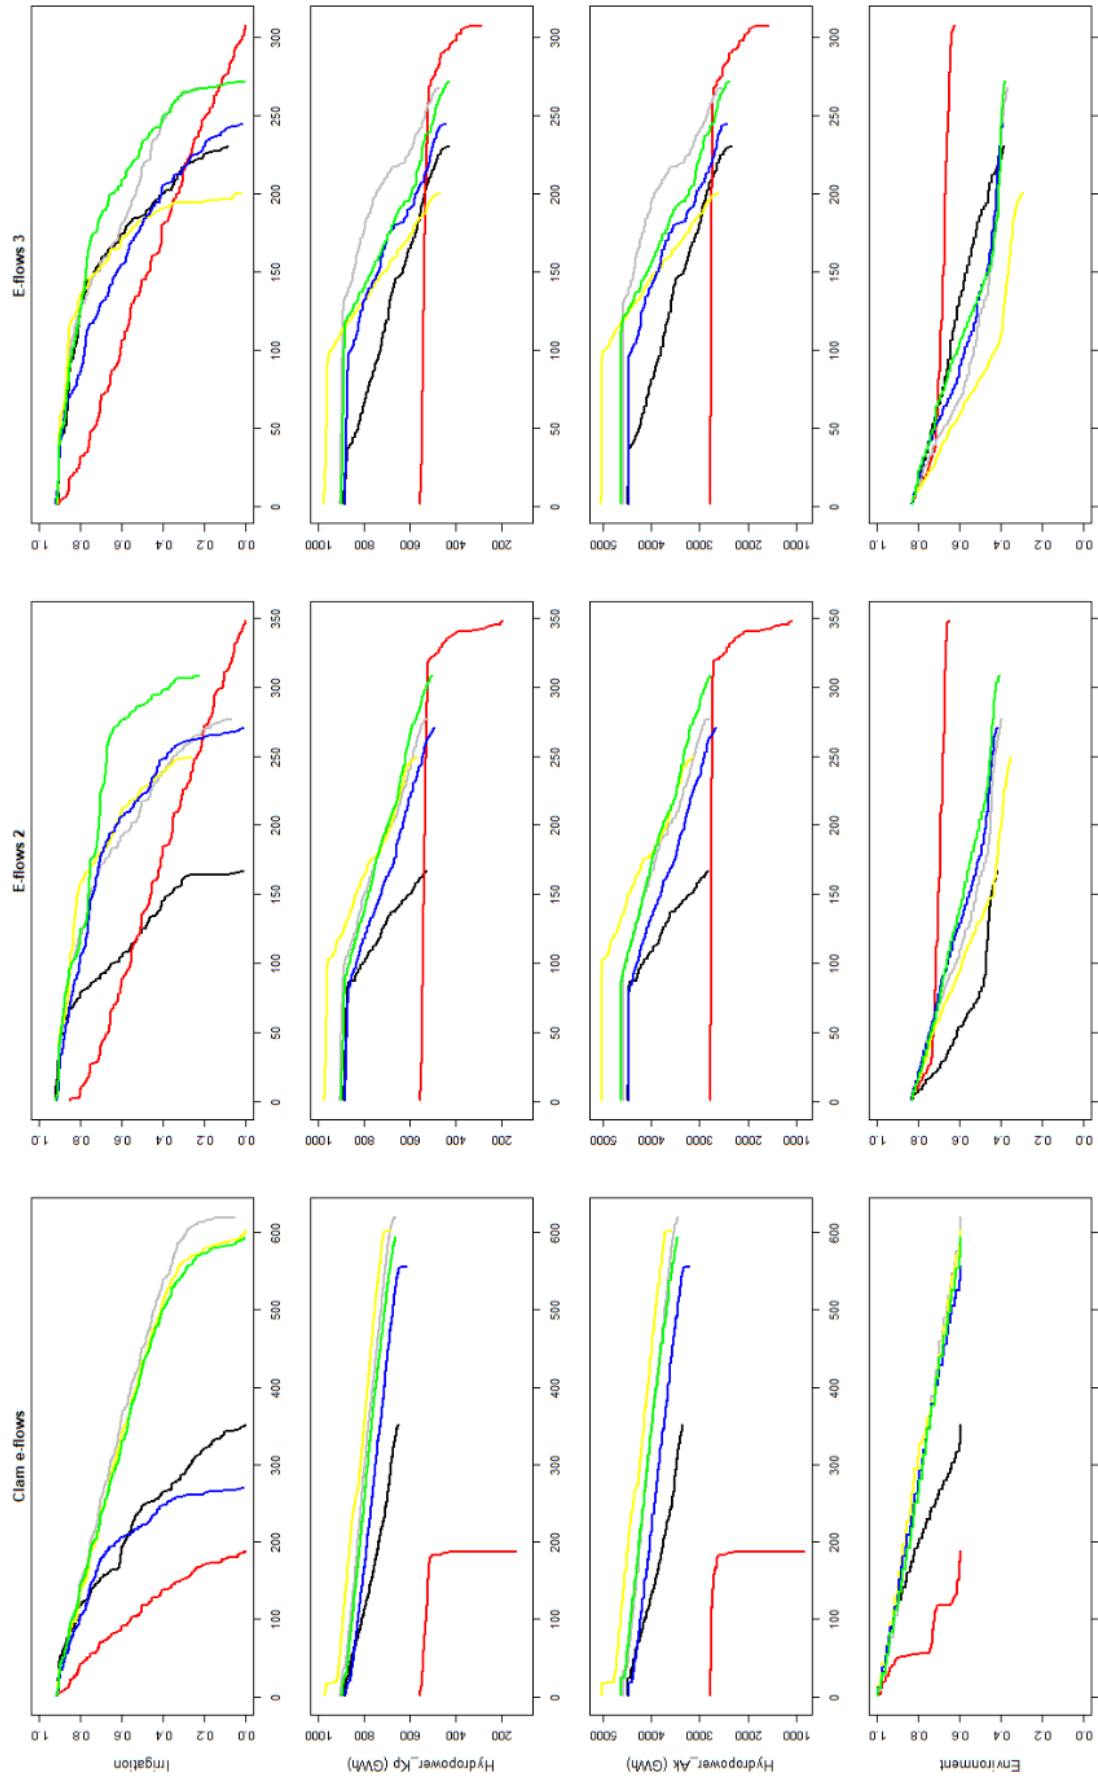

Figure S4: Cumulative distributive graphs showing the function values of all the non-dominated solutions for the baseline and future scenarios. Notation- scenarios: S1 to S5- Scenario 1 to 5, D- dry season flow, W- wet season flow
