# Supplementary material for: Quantifying the trade-offs in re-operating dams for the environment in the Lower Volta River
Source: Copernicus journal article supplement (doi:10.5194/hess-2022-270), 2022-08-04
Supplement: Supplementary file [file hess-2022-270-AC2-supplement.pdf]

# Quantifying the trade-offs in re-operating dams for the environment in the Lower Volta River

Afua Owusu<sup>a,b</sup>, Jazmin Zatarain Salazar<sup>b</sup>, Marloes Mul<sup>a</sup>, Pieter van der Zaag<sup>a,c</sup>, Jill Slinger<sup>b,d</sup>

<sup>a</sup> Land and Water Management Department, IHE Delft Institute for Water Education, Westvest 7, 2611 AX Delft, The Netherlands

<sup>b</sup> Faculty of Technology, Policy and Management, TU Delft, Jaffalaan 5, 2628 BX Delft, The Netherlands

<sup>c</sup> Faculty of Civil Engineering and Geosciences, TU Delft, Stevinweg 1, 2628 CN Delft, The Netherlands

<sup>d</sup> Institute of Water Research, Rhodes University, Drostdy Rd, Grahamstown, 6139, South Africa

## Response to reviewers:

The authors thank the reviewers for their insightful comments which have proved very helpful in revising the manuscript. Below are detailed responses to the individual comments raised by each reviewer with new/modified text highlighted. In responding to reviewer 1, the specific comments are addressed before the response to the questions raised in the overall summary.

| Location          | Comment and Response                                                                                                                                                                                                                                                                                                                                                                                                                                                                                                                                                                                                                                                                                                                                                                                                                                                                                                                                                                                                                                                                                                                                                                                                                                                                                                                                                                                                                                                                                                                                                                                                                                                                                                                                                                                                                                                                                                                                               |
|-------------------|--------------------------------------------------------------------------------------------------------------------------------------------------------------------------------------------------------------------------------------------------------------------------------------------------------------------------------------------------------------------------------------------------------------------------------------------------------------------------------------------------------------------------------------------------------------------------------------------------------------------------------------------------------------------------------------------------------------------------------------------------------------------------------------------------------------------------------------------------------------------------------------------------------------------------------------------------------------------------------------------------------------------------------------------------------------------------------------------------------------------------------------------------------------------------------------------------------------------------------------------------------------------------------------------------------------------------------------------------------------------------------------------------------------------------------------------------------------------------------------------------------------------------------------------------------------------------------------------------------------------------------------------------------------------------------------------------------------------------------------------------------------------------------------------------------------------------------------------------------------------------------------------------------------------------------------------------------------------|
| <b>Reviewer 1</b> |                                                                                                                                                                                                                                                                                                                                                                                                                                                                                                                                                                                                                                                                                                                                                                                                                                                                                                                                                                                                                                                                                                                                                                                                                                                                                                                                                                                                                                                                                                                                                                                                                                                                                                                                                                                                                                                                                                                                                                    |
| Lines 23<br>- 24  | <p><b>Comment 1.1:</b></p> <p>“There is uncertainty in climate change effects on runoff in this region.” The study evaluates the impact of six climate change scenarios. Are those six scenarios representative of and account for the climate change uncertainty in the Volta River basin. How robust are the presented results of the six evaluated scenarios?</p> <p><b>Response:</b></p> <p>In section 3.2, the systematic literature review which informed the choice of the <i>five</i> runoff scenarios is presented. This literature review identified papers that specifically focussed on the anticipated impacts of climate change on run-off in the entire Volta Basin, either as a whole or all sub-basins. These climate-runoff studies presented a very varied and thus uncertain picture with predicted changes in annual runoff ranging from +65% to -45%. The five scenarios presented in this paper span across this range for annual and seasonal runoff.</p> <p>The high uncertainty in climate projections for the study area is a major challenge in developing adaptation strategies for the region. However, in this study, the conclusion from the analysis indicates that both an increase or decrease in inflows (due to climate change) lowers the trade-off between e-flows and hydropower. The authors believe that this is an important point to make as it shows that with respect to the existing e-flows recommendations, uncertainty about the direction of CC is not a limitation to their potential implementation.</p> <p>On the robustness of the presented results for the 5 evaluated scenarios, in the conclusion the authors recommend that <i>“Future studies should focus on the robustness and limits of these policies under multitudinous future climatic and water use scenarios.”</i> We want to emphasize that our goal for this study was to first discover Pareto optimal policies across the objectives</p> |

| Location   | Comment and Response                                                                                                                                                                                                                                                                                                                                                                                                                                                                                                                                                                                                                                                                                                                                                                                                                                                                                                                                                                                                                                                                                                                                                                                                                                                                                                                                                                                                                                                                                                                                                                                                                                                                                                                                                                                                                                                                                                                                                                                                                                                                                                                                                      |
|------------|---------------------------------------------------------------------------------------------------------------------------------------------------------------------------------------------------------------------------------------------------------------------------------------------------------------------------------------------------------------------------------------------------------------------------------------------------------------------------------------------------------------------------------------------------------------------------------------------------------------------------------------------------------------------------------------------------------------------------------------------------------------------------------------------------------------------------------------------------------------------------------------------------------------------------------------------------------------------------------------------------------------------------------------------------------------------------------------------------------------------------------------------------------------------------------------------------------------------------------------------------------------------------------------------------------------------------------------------------------------------------------------------------------------------------------------------------------------------------------------------------------------------------------------------------------------------------------------------------------------------------------------------------------------------------------------------------------------------------------------------------------------------------------------------------------------------------------------------------------------------------------------------------------------------------------------------------------------------------------------------------------------------------------------------------------------------------------------------------------------------------------------------------------------------------|
| Reviewer 1 | <p>of the Volta River basin under the five plausible scenarios. Nonetheless, as a follow up to this present study, an uncertainty evaluation has now been carried out for the optimised release policies found in this study for 2400 scenarios and the robustness for each policy compared across different robustness metrics (Buskop, 2022). The main results are in line with the present study in that:</p> <p>“Using various robustness metrics to define stakeholder preferences across objectives shows the same trade-offs as in the unmodified objective scores. Environmental policies do not perform well with energy objectives, while the hydropower policies do not work well for the irrigation and environmental objectives” (Buskop, 2022, Page vi). The findings from this MSc thesis are being prepared for journal publication.</p> <p>Buskop, T. (2022). <i>Will the Benefits Keep Flowing?</i> MSc thesis, TU Delft. Available at: <a href="https://repository.tudelft.nl/islandora/object/uuid%3A02d941cf-b7a8-4498-9a13-762c7e6988fc?collection=education">https://repository.tudelft.nl/islandora/object/uuid%3A02d941cf-b7a8-4498-9a13-762c7e6988fc?collection=education</a></p>                                                                                                                                                                                                                                                                                                                                                                                                                                                                                                                                                                                                                                                                                                                                                                                                                                                                                                                                                               |
|            | <p><b>Comment 1.2:</b></p> <p>The literature review only focuses on EMODPS; there is no discussion about other methods used to identify reservoir operations. How does EMODPS compare with other techniques? Also, there is no transition between presenting MOEAs and EMODPS methods. MOEAs should be presented first, as EMODPS uses MOEAs to identify reservoir policies.</p> <p><b>Response:</b></p> <p>The authors are grateful for this comment and have updated the introduction to first present MOEAs followed by EMODPS. The advantage of EMODPS is also presented. The changes made to the text in response to this comment in the introduction are:</p> <p>Introduction:</p> <p><i>Multi-objective evolutionary algorithms (MOEAs) are one such tool for assessing the trade-offs between water users in a river basin. MOEAs use stochastic search tools to simultaneously find the Pareto approximate set across multiple objectives (Reed et al., 2013; Matrosov et al., 2015; Hurford et al., 2020; Zatarain Salazar et al., 2016; Kiptala et al., 2018). The Pareto approximate or non-dominated set of solutions are the suite of solutions for which increasing the water allocation to one user leads to a reduction in the benefit to others. The advantage of MOEAs is that they do not require pre-specifying preferences across objectives, thereby supporting unbiased a posteriori decision making (Reed et al., 2013; Hurford et al., 2014). Furthermore, MOEAs allow for heterogeneous and non-linear problem formulations with incommensurable objectives and different risk attitudes across objectives. Accordingly, non-market objectives can be evaluated alongside conventional economic objectives. This is particularly useful for including environmental flows (e-flows) and ecosystem services for which monetary valuation is often difficult and contested (Bingham et al., 1995; Costanza et al., 1997, 2014; Luisetti et al., 2011). The capability of MOEAs to find Pareto approximate strategies for a suite of water systems applications has been thoroughly assessed by Reed et al. (2013), and for multi-purpose</i></p> |

| Location          | Comment and Response                                                                                                                                                                                                                                                                                                                                                                                                                                                                                                                                                                                                                                                                                                                                                                                                                                                                                                                                                                                                                                                                                                                                                                                                                                                                                                                                                                                                                                                                                                                                                                                                                    |
|-------------------|-----------------------------------------------------------------------------------------------------------------------------------------------------------------------------------------------------------------------------------------------------------------------------------------------------------------------------------------------------------------------------------------------------------------------------------------------------------------------------------------------------------------------------------------------------------------------------------------------------------------------------------------------------------------------------------------------------------------------------------------------------------------------------------------------------------------------------------------------------------------------------------------------------------------------------------------------------------------------------------------------------------------------------------------------------------------------------------------------------------------------------------------------------------------------------------------------------------------------------------------------------------------------------------------------------------------------------------------------------------------------------------------------------------------------------------------------------------------------------------------------------------------------------------------------------------------------------------------------------------------------------------------|
| <b>Reviewer 1</b> | <p><i>reservoir operations by Zatarain Salazar et al. (2016). In this paper, an Evolutionary Multi-Objective Direct Policy Search (EMODPS) framework is applied to map the states of a system, in this case, reservoir levels and time of the year, to actions, the release of water for different water uses (Giuliani et al., 2016; Zatarain Salazar et al., 2017). This approach has been applied to find Pareto approximate operating policies for multi-objective, multi-reservoir systems (Quinn et al., 2017; Wild et al., 2019). The motivation to use EMODPS was informed by the fact that for the selected case study, multi-objective reservoir operating policies had to be found under uncertainty. Traditional approaches for optimal control, such as stochastic dynamic programming, do not permit finding the Pareto approximate policies across multiple objectives in a single run, requiring instead that the Pareto front is constructed by testing different weights for each of the system’s objectives. Such a method increases the computational burden and yields a sparse Pareto front thereby potentially missing regions of suitable policies. The use of EMODPS overcomes this challenge by generating the trade-offs across all the system’s objectives simultaneously in a single algorithmic run, creating a diverse and more accurate Pareto front (Giuliani et al, 2016). This motivates the use of direct policy search, in which radial basis functions are used to find a flexible shape to map storage levels and time to release decisions for multiple objectives.</i></p>                     |
| Lines 92 to 93.   | <p><b>Comment 1.3:</b></p> <p>“As such, the implications of the trade-off on power delivery, energy prices and carbon emissions are not investigated”. Dams and hydropower plants are not isolated infrastructures. The state-of-the-art is moving to evaluate the multisector implications of human-nature resources systems. Any reduction in hydropower generation not only impacts “the water demands” for this use, its impacts the power system (emission, energy prices, country economy, etc.). I recommend improving the discussion on the real implications of reducing hydropower generation in the country.</p> <p><b>Response:</b></p> <p>The main contributions of this paper are twofold. First, it explores the room for compromise in the Lower Volta by the quantifying the Pareto optimal trade-offs when e-flows previously prescribed for the basin are implemented. Secondly this paper is a new application of the EMODPS to a data scarce region where only the system goals and direction of preference are specified in the multi-objective evolutionary optimization. The manuscript therefore does not seek to evaluate the full system trade-offs comprehensively. Rather it explores the trade-offs inherent to e-flow implementation and uses an established method (EMODPS) in a new situation in doing this. So, the paper’s aim lies in between a methodological advancement and evaluating system trade-offs</p> <p>The authors agree that additional research is needed to assess the system trade-offs comprehensively i.e.: the real implications of meeting e-flow demands on the emissions,</p> |

| Location   | Comment and Response                                                                                                                                                                                                                                                                                                                                                                                                                                                                                                                                                                                                                                                                                                                                                                                                                                                                                                                                                                                                                                                                                                                                                                                                                                                                                                                                                                                                                                                                                                                                                                                                                                                                                                                                                                                                                                                                                                                                                                                                                                                                                                                                                                                                                                                                                                                                                                                                                                                                                                                                                                                                                                                                                                                                                                                                                                                                                                                                                                                                                                                                                                                                                                                                                                                                                                                                                                                                                                                                                                                           |
|------------|------------------------------------------------------------------------------------------------------------------------------------------------------------------------------------------------------------------------------------------------------------------------------------------------------------------------------------------------------------------------------------------------------------------------------------------------------------------------------------------------------------------------------------------------------------------------------------------------------------------------------------------------------------------------------------------------------------------------------------------------------------------------------------------------------------------------------------------------------------------------------------------------------------------------------------------------------------------------------------------------------------------------------------------------------------------------------------------------------------------------------------------------------------------------------------------------------------------------------------------------------------------------------------------------------------------------------------------------------------------------------------------------------------------------------------------------------------------------------------------------------------------------------------------------------------------------------------------------------------------------------------------------------------------------------------------------------------------------------------------------------------------------------------------------------------------------------------------------------------------------------------------------------------------------------------------------------------------------------------------------------------------------------------------------------------------------------------------------------------------------------------------------------------------------------------------------------------------------------------------------------------------------------------------------------------------------------------------------------------------------------------------------------------------------------------------------------------------------------------------------------------------------------------------------------------------------------------------------------------------------------------------------------------------------------------------------------------------------------------------------------------------------------------------------------------------------------------------------------------------------------------------------------------------------------------------------------------------------------------------------------------------------------------------------------------------------------------------------------------------------------------------------------------------------------------------------------------------------------------------------------------------------------------------------------------------------------------------------------------------------------------------------------------------------------------------------------------------------------------------------------------------------------------------------|
| Reviewer 1 | <p>energy prices and the economy of both Ghana and neighbouring countries to which power from the Akosombo dam is sold. This will require follow-up studies encompassing a review of the energy sector in Ghana and the politics that drive it, stakeholder engagement and feasibility studies. This is beyond the scope of the present research.</p> <p>In the discussion, we touch on the potential implications of e-flow implementation when we state that:</p> <p><i>For instance, an increase in irrigation demand will trade-off against hydropower production at Kpong Dam and an increase in the firm energy requirement or the continuation of the de-facto policy of hydropower maximisation at Akosombo Dam, despite the availability of alternative power generation sources (Dye, 2020; Kumi, 2017), will weaken the potential for re-operation of the dam for the riverine environment. Changes in upstream water consumption as well as the construction of new dams such as the Pwalugu Dam in northern Ghana will also affect inflows to the Akosombo Dam. Gonzalez et al. (2021), however, show that practical coordination of the operation of major infrastructure in the Volta Basin, as compared to the current approach whereby dam operators fail to consider downstream built infrastructure, reduces the impact on inflows to the Akosombo Dam in particular, and also maximises basin-wide benefits. Undoubtedly this coordination should extend beyond the Volta Basin to include the entire electricity generation portfolio of Ghana and neighbouring countries to further reduce the impact of e-flows implementation in the Lower Volta on power supply.</i></p> <p><i>In the potential re-operation of the Akosombo and Kpong dams, one has to consider that the majority of the alternative sources of power in Ghana use carbon fuels (Dye, 2020) and thus most likely contribute more to climate change compared to power generation from these two existing dams (dos Santos et al., 2006; Barros et al., 2011). It is therefore recommended that future studies encompass an overview of the energy landscape of Ghana and investigate carbon emissions, as well as examining energy price and economic implications. By exploring the room for compromise in the Lower Volta with respect to e-flows implementation this research has taken a first step towards a comprehensive assessment of the trade-offs involved at a national and local level. The potential re-operation of the Akosombo and Kpong dams can also benefit from (i) the groundwork laid by research on the pre- and post-dam river system (Lawson, 1972; Tsikata, 2008; De-Graft Johnson, 1999; Nyekodzi et al., 2018; Obirikorang et al., 2013; Adjei-Boateng et al., 2012; Owusu et al., 2022b), (ii) insights deriving from interviews and extensive stakeholder engagement (Ayivor and Ofori, 2017; Ohemeng et al., 2017; Nukpezah et al., 2017), and (iii) existing supporting legislation for e-flows implementation (L.I. 1692 Water Use Regulations, Ghana, 2001). Indeed, research on successful and stalled cases of dam re-operation indicates that stakeholder engagement and supporting legislation enhance the chances of successful e-flows implementation (Owusu et al., 2022a, 2021).</i></p> <p><small>Dye, B. J. (2020). <i>Structural reform and the politics of electricity crises in Ghana: tidying whilst the house is on fire?</i> (013 FutureDAMS Working Paper; FutureDAMS Working Paper).</small></p> |

| Location          | Comment and Response                                                                                                                                                                                                                                                                                                                                                                                                                                                                                                                                                                                                                                                                                                                                                                                                                                                                                                                                                                                                                                                                                                                                                                                                                                                                                                                                                                                                                                                                                                                                                                         |
|-------------------|----------------------------------------------------------------------------------------------------------------------------------------------------------------------------------------------------------------------------------------------------------------------------------------------------------------------------------------------------------------------------------------------------------------------------------------------------------------------------------------------------------------------------------------------------------------------------------------------------------------------------------------------------------------------------------------------------------------------------------------------------------------------------------------------------------------------------------------------------------------------------------------------------------------------------------------------------------------------------------------------------------------------------------------------------------------------------------------------------------------------------------------------------------------------------------------------------------------------------------------------------------------------------------------------------------------------------------------------------------------------------------------------------------------------------------------------------------------------------------------------------------------------------------------------------------------------------------------------|
| <b>Reviewer 1</b> |                                                                                                                                                                                                                                                                                                                                                                                                                                                                                                                                                                                                                                                                                                                                                                                                                                                                                                                                                                                                                                                                                                                                                                                                                                                                                                                                                                                                                                                                                                                                                                                              |
|                   | <p>The Discussion now also covers the application of EMODPS to the study:<br/> <i>Finally, the successful application of the EMODPS framework in exploring trade-offs inherent to e-flows implementation in a heavily modified river under uncertainty holds promise for similar applications elsewhere. In order to find a policy for multiple objectives in such cases, a flexible structure to map states to actions is needed. With traditional control optimization techniques, the uncertainties need to be modelled explicitly, which creates a high computational burden and limits the ability to evaluate a large set of uncertainties (Giuliani et al., 2016). EMODPS overcomes this challenge by directly conditioning the decisions to exogenous information without requiring an explicit probabilistic model. With EMODPS, only the goals and direction of preference are required in setting up the multi-objective decision problem, making the use of this method feasible even in data scarce conditions. This study therefore concurs with Herman et al. (2020) who argue that direct policy search methods are a promising technique to enable adaptivity in water resources assessment by allowing the flexible integration of new information about the system into management decision making.</i></p>                                                                                                                                                                                                                                                               |
|                   | <p>Comment 1.4:<br/> Lines 157 to 165. Is it unclear why the model was calibrated for three years with specific conditions to the system (wet, dry and normal) if the authors have access to historical data from 1981 to 2012? Why do not to calibrate the model for the full historical time-series? The calibration process produced only one reservoir operating policy for the wet, dry and normal conditions of the system, or it produces a policy by condition.</p> <p>Response:<br/> This was a practical decision to expedite the calibration phase of the study. The choice was therefore made to check the performance of the model against specific conditions (wet, dry and normal) using the current baseline dam operation objectives of meeting firm energy and irrigation demands and preventing flooding. In a follow-up study, we explore the vulnerabilities to hydro-climatic uncertainty (by not only using the entire historical record but also expanding upon it via synthetic hydrology to have a larger probability of sampling floods and droughts). In the case of this study, the priority is to generate the trade-offs under very little, but targeted assumptions about the hydrology of the system; in essence applying the method in a data poor situation. The reason behind the choice to calibrate for specific conditions is now stated in the manuscript:<br/> <i>The choice to calibrate for years with specific conditions as against the full historical time series was a practical one to expedite the calibration phase of the study.</i></p> |
| Line 116          | <p><b>Comment 1.5:</b><br/> “to a steady flow of about 1,000 m<sup>3</sup>/s all year round”. Is this steady flow the average flow downstream of Akosombo? Could the authors inform about the Akosombo release seasonality and monthly flow variability?</p>                                                                                                                                                                                                                                                                                                                                                                                                                                                                                                                                                                                                                                                                                                                                                                                                                                                                                                                                                                                                                                                                                                                                                                                                                                                                                                                                 |

| Location               | Comment and Response                                                                                                                                                                                                                                                                                                                                                                                                                                                                                                                                                                                                                                                                                                                                                                                                                                                                                                                                                                                                                                                                                                                                                                                                                                                                                                                                                                                                                                                                                                                                                                                                                                                                                                                                                                                                                                                                                                                                                                 |
|------------------------|--------------------------------------------------------------------------------------------------------------------------------------------------------------------------------------------------------------------------------------------------------------------------------------------------------------------------------------------------------------------------------------------------------------------------------------------------------------------------------------------------------------------------------------------------------------------------------------------------------------------------------------------------------------------------------------------------------------------------------------------------------------------------------------------------------------------------------------------------------------------------------------------------------------------------------------------------------------------------------------------------------------------------------------------------------------------------------------------------------------------------------------------------------------------------------------------------------------------------------------------------------------------------------------------------------------------------------------------------------------------------------------------------------------------------------------------------------------------------------------------------------------------------------------------------------------------------------------------------------------------------------------------------------------------------------------------------------------------------------------------------------------------------------------------------------------------------------------------------------------------------------------------------------------------------------------------------------------------------------------|
| <b>Reviewer 1</b>      |                                                                                                                                                                                                                                                                                                                                                                                                                                                                                                                                                                                                                                                                                                                                                                                                                                                                                                                                                                                                                                                                                                                                                                                                                                                                                                                                                                                                                                                                                                                                                                                                                                                                                                                                                                                                                                                                                                                                                                                      |
|                        | <p><b>Response:</b><br/>           No account is taken of seasonality under the current release at Akosombo. For clarity, the text (Line 137) now reads:<br/> <i>to a steady flow of about 1,000 m<sup>3</sup>/s per month all year round with no account taken of seasonality (Ntiamao-Baidu et al., 2017).</i></p>                                                                                                                                                                                                                                                                                                                                                                                                                                                                                                                                                                                                                                                                                                                                                                                                                                                                                                                                                                                                                                                                                                                                                                                                                                                                                                                                                                                                                                                                                                                                                                                                                                                                 |
| Lines<br>224 to<br>225 | <p><b>Comment 1.6:</b><br/>           “While the annual firm power requirement from Akosombo Dam is 4415 GWh/year.” [GWh] units refer to energy while [GW] units to power. Please, check if you are referring to “firm energy generation”.</p> <p><b>Response:</b><br/>           The authors are grateful to the reviewer for drawing our attention to this. This has been corrected to “firm energy” throughout the text.</p>                                                                                                                                                                                                                                                                                                                                                                                                                                                                                                                                                                                                                                                                                                                                                                                                                                                                                                                                                                                                                                                                                                                                                                                                                                                                                                                                                                                                                                                                                                                                                      |
|                        | <p><b>Overall summary:</b><br/> <b>Part 1:</b> In terms of the manuscript’s contribution is not clear if the authors are presenting a methodological advance or presenting the system trade-offs among different water users in the Lower Volta River basin. If the contribution is methodological, it is not clear how what the author present is different from other previous studies that use EMODPS. If the contribution it is to presents the system trade-offs, the discussion/implications of reducing hydropower generation lack broader consequences for the country and its economy. How could the results be presented to relevant decision-makers in the country if only local 'benefits' (lines 444 to 452) are given to 'validate' the implementation of hydropower reduction to support e-flow implementations? Does Ghana have alternatives to replace cheap and flexible hydropower generation? If the reduction in hydropower is replaced by thermal generation, how will this impact nationally determined contributions (in terms of CO2 emission reduction)? What is the local vs country-wide trade-offs of reducing hydropower generation? I consider these questions need to be answered if the paper aims to be a viable input to any discussion on re-operating the Akosombo and Kpong hydropower plants. I recommend improving the paper's discussion and implications by including a clear discussion of the previously highlighted points.</p> <p><b>Response:</b><br/>           The manuscript neither presents a methodological advancement nor presents an evaluation of system trade-offs. Instead, its aim is twofold, lying in between the aforementioned goals: First, it explores the room for compromise in the Lower Volta by the quantifying the Pareto optimal trade-offs when e-flows previously prescribed for the basin are implemented. Secondly this paper is a new application of the EMODPS to a data scarce region under high</p> |

| Location          | Comment and Response                                                                                                                                                                                                                                                                                                                                                                                                                                                                                                                                                                                                                                                                                                                                                                                                                                                                                                                                                                                                                                                                                                                                                                                                                                                                                                                                                                                                                                                                                                                                                                                                                                                                                                                                                                                                                                                                                                                                                                                                                                                                                                                                                                                                                                                                                                                                                                                                                                                                                                                                                                                                                                                                                                                                                                                                                                                                                                                                                                                                                                                                                                                                                                                                                                                                                                   |
|-------------------|------------------------------------------------------------------------------------------------------------------------------------------------------------------------------------------------------------------------------------------------------------------------------------------------------------------------------------------------------------------------------------------------------------------------------------------------------------------------------------------------------------------------------------------------------------------------------------------------------------------------------------------------------------------------------------------------------------------------------------------------------------------------------------------------------------------------------------------------------------------------------------------------------------------------------------------------------------------------------------------------------------------------------------------------------------------------------------------------------------------------------------------------------------------------------------------------------------------------------------------------------------------------------------------------------------------------------------------------------------------------------------------------------------------------------------------------------------------------------------------------------------------------------------------------------------------------------------------------------------------------------------------------------------------------------------------------------------------------------------------------------------------------------------------------------------------------------------------------------------------------------------------------------------------------------------------------------------------------------------------------------------------------------------------------------------------------------------------------------------------------------------------------------------------------------------------------------------------------------------------------------------------------------------------------------------------------------------------------------------------------------------------------------------------------------------------------------------------------------------------------------------------------------------------------------------------------------------------------------------------------------------------------------------------------------------------------------------------------------------------------------------------------------------------------------------------------------------------------------------------------------------------------------------------------------------------------------------------------------------------------------------------------------------------------------------------------------------------------------------------------------------------------------------------------------------------------------------------------------------------------------------------------------------------------------------------------|
| <b>Reviewer 1</b> | <p>uncertainty where only the system goals and direction of preference are specified in the multi-objective decision problem.</p> <p>In the discussion, we touch on the potential implications of dam re-operation. The authors agree that additional research is needed to comprehensively determine the system trade-offs i.e.: the real implications of meeting e-flow demands on the emissions, energy prices and the economy of both Ghana and neighbouring countries to which power from the Akosombo dam is sold. This will require follow-up studies encompassing a review of the energy sector in Ghana and the politics that drive it, stakeholder engagement and feasibility studies. This is beyond the scope of the present research; however, our research represents a necessary first step in an exploration of the potential for e-flows implementation.</p> <p><b>Overall summary:</b></p> <p><b>Part 2:</b> Does Ghana have alternatives to replace cheap and flexible hydropower generation? If the reduction in hydropower is replaced by thermal generation, how will this impact nationally determined contributions (in terms of CO2 emission reduction)? What is the local vs country-wide trade-offs of reducing hydropower generation? I consider these questions need to be answered if the paper aims to be a viable input to any discussion on re-operating the Akosombo and Kpong hydropower plants. I recommend improving the paper's discussion and implications by including a clear discussion of the previously highlighted points.</p> <p><b>Response:</b></p> <p>The authors agree that additional research is needed for the results to be used by relevant decision makers. This will require comprehensive follow-up studies encompassing an overview of the energy landscape of Ghana, stakeholder engagement and feasibility studies on energy price, carbon emissions, etc. This is beyond the scope of the current research; however, this research is a necessary first step in exploring trade-offs inherent to e-flows implementation.</p> <p>In response to the comment on alternatives to hydropower, we would like to highlight that Ghana does have alternatives to hydropower. These alternatives are not necessarily cheap. Agreements were made that Ghana must pay 90% of the cost of energy from these alternative sources irrespective of whether they are used or not. This provides an incentive to use the alternative sources. As Dye (2020, Page 4) says in his overview of the energy situation in Ghana and the politics that drive it, "this crisis of shortage was quickly replaced with one of overabundance: Ghana went into a power plant construction overdrive, resulting in electricity-generation capacity equalling twice the country's demand by 2018". He goes further explaining that: "This increase is particularly problematic as it came from 'take-or-pay' contracts that involve the government's distribution utility, the Electricity Company of Ghana (ECG), promising to pay private electricity companies typically for 90% of the power they make available, regardless of whether it is used. Ghana's large imbalance in supply and demand is leaving a costly bill, reaching 4%–5% of GDP in 2018 (World Bank, 2018)".</p> |

| Location   | Comment and Response                                                                                                                                                                                                                                                                                                                                                                                                                                                                                                                                                                                                                                                                                                                                                                                                                                                                                                                                                                                                                                                                                                                                                                                                                                                                                                                                                                                                                                                                                                                                                                                                                                                                                                                                                                                                                                                                                                                                                                                                                                                                                                                                                                                                                                                                                                                                                                                                                                                                                                                                                                                                                                                                                                                                                                                                                                                                                                                                                                                                                                                                                                                                                                                                                                                                                                                                                                                                                                                                                                                                                                                                                                                                   |
|------------|----------------------------------------------------------------------------------------------------------------------------------------------------------------------------------------------------------------------------------------------------------------------------------------------------------------------------------------------------------------------------------------------------------------------------------------------------------------------------------------------------------------------------------------------------------------------------------------------------------------------------------------------------------------------------------------------------------------------------------------------------------------------------------------------------------------------------------------------------------------------------------------------------------------------------------------------------------------------------------------------------------------------------------------------------------------------------------------------------------------------------------------------------------------------------------------------------------------------------------------------------------------------------------------------------------------------------------------------------------------------------------------------------------------------------------------------------------------------------------------------------------------------------------------------------------------------------------------------------------------------------------------------------------------------------------------------------------------------------------------------------------------------------------------------------------------------------------------------------------------------------------------------------------------------------------------------------------------------------------------------------------------------------------------------------------------------------------------------------------------------------------------------------------------------------------------------------------------------------------------------------------------------------------------------------------------------------------------------------------------------------------------------------------------------------------------------------------------------------------------------------------------------------------------------------------------------------------------------------------------------------------------------------------------------------------------------------------------------------------------------------------------------------------------------------------------------------------------------------------------------------------------------------------------------------------------------------------------------------------------------------------------------------------------------------------------------------------------------------------------------------------------------------------------------------------------------------------------------------------------------------------------------------------------------------------------------------------------------------------------------------------------------------------------------------------------------------------------------------------------------------------------------------------------------------------------------------------------------------------------------------------------------------------------------------------------|
| Reviewer 1 | <p data-bbox="321 321 1365 369">Dye, B. J. (2020). <i>Structural reform and the politics of electricity crises in Ghana: tidying whilst the house is on fire?</i> (013 FutureDAMS Working Paper; FutureDAMS Working Paper).</p> <p data-bbox="321 415 1219 443">The contribution of the present study has been clarified in the introduction:</p> <p data-bbox="321 453 1435 646"><i>The main contribution of the paper is twofold: First, it explores the room for compromise in the Lower Volta by the quantifying the Pareto approximate trade-offs when e-flows previously prescribed for the basin are implemented. Secondly this paper is a new application of the EMODPS to a data scarce region under high uncertainty where only the system goals and direction of preference are specified in the multi-objective decision problem.</i></p> <p data-bbox="321 699 1435 1262">In Discussion, we touch on the potential implications of e-flows implementation:<br/> <i>For instance, an increase in irrigation demand will trade-off against hydropower production at Kpong Dam and an increase in the firm energy requirement or the continuation of the de-facto policy of hydropower maximisation at Akosombo Dam, despite the availability of alternative power generation sources (Dye, 2020; Kumi, 2017), will weaken the potential for re-operation of the dam for the riverine environment. Changes in upstream water consumption as well as the construction of new dams such as the Pwalugu Dam in northern Ghana will also affect inflows to the Akosombo Dam. Gonzalez et al. (2021), however, show that practical coordination of the operation of major infrastructure in the Volta Basin, as compared to the current approach whereby dam operators fail to consider downstream built infrastructure, reduces the impact on inflows to the Akosombo Dam in particular, and also maximises basin-wide benefits. Undoubtedly this coordination should extend beyond the Volta Basin to include the entire electricity generation portfolio of Ghana and neighbouring countries to further reduce the impact of e-flows implementation in the Lower Volta on power supply.</i></p> <p data-bbox="321 1287 1435 1892"><i>In the potential re-operation of the Akosombo and Kpong dams, one has to consider that the majority of the alternative sources of power in Ghana use carbon fuels (Dye, 2020) and thus most likely contribute more to climate change compared to power generation from these two existing dams (dos Santos et al., 2006; Barros et al., 2011). It is therefore recommended that future studies encompass an overview of the energy landscape of Ghana and investigate carbon emissions, as well as examining energy price and economic implications. By exploring the room for compromise in the Lower Volta with respect to e-flows implementation this research has taken a first step towards a comprehensive assessment of the trade-offs involved at a national and local level. The potential re-operation of the Akosombo and Kpong dams can also benefit from (i) the groundwork laid by research on the pre- and post-dam river system (Lawson, 1972; Tsikata, 2008; De-Graft Johnson, 1999; Nyekodzi et al., 2018; Obirikorang et al., 2013; Adjei-Boateng et al., 2012; Owusu et al., 2022b), (ii) insights deriving from interviews and extensive stakeholder engagement (Ayivor and Ofori, 2017; Ohemeng et al., 2017; Nukpezah et al., 2017), and (iii) existing supporting legislation for e-flows implementation (L.I. 1692 Water Use Regulations, Ghana, 2001). Indeed, research on successful and stalled cases</i></p> |



| Location   | Comment and Response                                                                                                                                                                                                                                                                                                                                                                                                                                                                                                                                                                                                                                                                                                                                                                                                                                                                                                                                                                                                                                                                                                                                                                                                                                                                                                                                                                                                                                                                                                                                                                                                                                                                                                                                                                                                                                                                                                                                                                                                                                                                                                                                                                                                                                                                                                                                                                                                                                                                                                                                                                                                                                                                                                                                                                                                                                                                                                                                                                                                                                                                                                                                                                                                       |
|------------|----------------------------------------------------------------------------------------------------------------------------------------------------------------------------------------------------------------------------------------------------------------------------------------------------------------------------------------------------------------------------------------------------------------------------------------------------------------------------------------------------------------------------------------------------------------------------------------------------------------------------------------------------------------------------------------------------------------------------------------------------------------------------------------------------------------------------------------------------------------------------------------------------------------------------------------------------------------------------------------------------------------------------------------------------------------------------------------------------------------------------------------------------------------------------------------------------------------------------------------------------------------------------------------------------------------------------------------------------------------------------------------------------------------------------------------------------------------------------------------------------------------------------------------------------------------------------------------------------------------------------------------------------------------------------------------------------------------------------------------------------------------------------------------------------------------------------------------------------------------------------------------------------------------------------------------------------------------------------------------------------------------------------------------------------------------------------------------------------------------------------------------------------------------------------------------------------------------------------------------------------------------------------------------------------------------------------------------------------------------------------------------------------------------------------------------------------------------------------------------------------------------------------------------------------------------------------------------------------------------------------------------------------------------------------------------------------------------------------------------------------------------------------------------------------------------------------------------------------------------------------------------------------------------------------------------------------------------------------------------------------------------------------------------------------------------------------------------------------------------------------------------------------------------------------------------------------------------------------|
| Reviewer 1 | <p data-bbox="321 281 1427 352"><i>of dam re-operation indicates that stakeholder engagement and supporting legislation enhance the chances of successful e-flows implementation (Owusu et al., 2022a, 2021).</i></p> <p data-bbox="321 405 849 436">And also discuss the application of EMODPS:</p> <p data-bbox="321 443 1435 968"><i>Finally, the successful application of the EMODPS framework in exploring trade-offs inherent to e-flows implementation in a heavily modified river under uncertainty holds promise for similar applications elsewhere. In order to find a policy for multiple objectives in such cases, a flexible structure to map states to actions is needed. With traditional control optimization techniques, the uncertainties need to be modelled explicitly, which creates a high computational burden and limits the ability to evaluate a large set of uncertainties (Giuliani et al., 2016). EMODPS overcomes this challenge by directly conditioning the decisions to exogenous information without requiring an explicit probabilistic model. With EMODPS, only the goals and direction of preference are required in setting up the multi-objective decision problem, making the use of this method feasible even in data scarce conditions. This study therefore concurs with Herman et al. (2020) who argue that direct policy search methods are a promising technique to enable adaptivity in water resources assessment by allowing the flexible integration of new information about the system into management decision making.</i></p> <p data-bbox="321 1020 537 1052"><b>Overall summary:</b></p> <p data-bbox="321 1058 1435 1335"><b>Part 3:</b> It is not clear how robust are the presented results in terms of future climate change impacts or upstream water uses changes. The Akosombo and Kpong hydropower plants are located downstream of the Volta River basin, and any change in water availability upstream in the basin could possibly impact the system evaluated in this study. Methods such as Sensitivity Analysis or Exploratory modelling evaluating ‘a wider range’ of future states of the system could provide more conclusive results and improve the discussion of future impacts of changes in water availability.</p> <p data-bbox="321 1388 448 1419"><b>Response:</b></p> <p data-bbox="321 1425 1435 1619">As a follow up to this present study and as part of an MSc thesis (Buskop, 2022), an uncertainty evaluation has been carried out for the optimised release policies from this study for 2400 scenarios representing different states of the world selected through the Latin Hypercube sampling. The robustness for each policy is compared across different robustness metrics (Buskop, 2022). The main results are in line with the current study in that:</p> <p data-bbox="321 1625 1435 1776">“Using various robustness metrics to define stakeholder preferences across objectives shows the same trade-offs as in the unmodified objective scores. Environmental policies do not perform well with energy objectives, while the hydropower policies do not work well for the irrigation and environmental objectives”</p> |

| Location                  | Comment and Response                                                                                                                                                                                                                                                                                                                                                                                                                                                                                                                                                                                                                                                                                                                                                                                                                                                                                                                                                                                                                                                                                                                                                                       |
|---------------------------|--------------------------------------------------------------------------------------------------------------------------------------------------------------------------------------------------------------------------------------------------------------------------------------------------------------------------------------------------------------------------------------------------------------------------------------------------------------------------------------------------------------------------------------------------------------------------------------------------------------------------------------------------------------------------------------------------------------------------------------------------------------------------------------------------------------------------------------------------------------------------------------------------------------------------------------------------------------------------------------------------------------------------------------------------------------------------------------------------------------------------------------------------------------------------------------------|
| <b>Reviewer 1</b>         |                                                                                                                                                                                                                                                                                                                                                                                                                                                                                                                                                                                                                                                                                                                                                                                                                                                                                                                                                                                                                                                                                                                                                                                            |
|                           | <p>On changes to upstream water use, Buskop (2022) states: “When looking into the importance of included uncertainties and system levers, it was seen that the water usages of Togo and Côte d’Ivoire play a significant role in the system.”</p> <p>The findings from this MSc thesis are being prepared for journal publication.</p> <p>Buskop, T. (2022). <i>Will the Benefits Keep Flowing?</i> MSc thesis, TU Delft. Available at: <a href="https://repository.tudelft.nl/islandora/object/uuid%3A02d941cf-b7a8-4498-9a13-762c7e6988fc?collection=education">https://repository.tudelft.nl/islandora/object/uuid%3A02d941cf-b7a8-4498-9a13-762c7e6988fc?collection=education</a></p>                                                                                                                                                                                                                                                                                                                                                                                                                                                                                                  |
| <b>Reviewer 2</b>         |                                                                                                                                                                                                                                                                                                                                                                                                                                                                                                                                                                                                                                                                                                                                                                                                                                                                                                                                                                                                                                                                                                                                                                                            |
| <p>Lines<br/>365-367:</p> | <p><b>Comment 2.1:</b></p> <p>The authors seem to suggest that the flood control objective is performing less well for e-flows 2 and 3 (0.83 down from 0.99 in clam e-flows. This is however not shown in Figure 4. Instead Figure 4 suggests the performance of the flood control objective remains the same across all e-flows.</p> <p><b>Response:</b></p> <p>The authors are grateful to the reviewer for highlighting the ambiguity in the text. The performance of the flood objective does remain the same, but the performance of the solution decreases for the environment objective for e-flows 2 and 3.</p> <p>The text has been updated to read:</p> <p><i>The solutions for all e-flow configurations perform well for the flood control objective even though e-flow 2 and 3 prescribe flood releases for two months of the year. As such, comparing clam e-flows to e-flows 2 and 3, there is a reduction (0.99 for clam e-flows vs. 0.83 for e-flows 2 and 3) in the performance of the ‘best environment’ solution for the latter two, as expected, showing that the requirement for floods for two months in a year in those e-flow configurations are not met.</i></p> |
